# Supplementary material for: Evaluation of Methods for Collecting Mosquitoes (Culicidae: Diptera) in Canopy and Ground Strata in the Brazilian Savanna
Source: MDPI journal article supplement (doi:10.3390/tropicalmed7120446), 2022-12-19
Supplement: s1 [file s1]

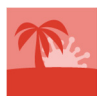

## Article

# Supplementary Materials for Evaluation of Methods for Collecting Mosquitoes (Culicidae: Diptera) in Canopy and Ground Strata in the Brazilian Savanna

**Table S1.** Number of male specimens collected by genus and species, according to stratum (canopy and ground) and capture technique (treatment). Santa Rita do Passa Quatro, SP, Brazil.

| Specie                     | N  | Method   | Stratum        |
|----------------------------|----|----------|----------------|
| <i>Culex</i> sp            | 8  | net      | ground /canopy |
| <i>Aedes albopictus</i>    | 13 | net      | ground         |
| <i>Psorophora albigena</i> | 3  | net/BGL* | ground         |
| <b>Total</b>               | 24 |          |                |

\* net, hand-net; BGL, CDC with only BG-Lure®.

**Table S2.** Results of the pairwise comparison between methods and strata by the Wilcoxon test.

| Strata | Methods  | Canopy |       |          |          |       | Ground |       |          |          |       |
|--------|----------|--------|-------|----------|----------|-------|--------|-------|----------|----------|-------|
|        |          | BGL    | CO2   | CO2+BGL1 | CO2+BGL2 | NET   | BGL    | CO2   | CO2+BGL1 | CO2+BGL2 | NET   |
| Canopy | BGL      |        | 0.072 | 0.011    | 0.027    | 0.000 | 0.020  | 0.000 | 0.001    | 0.000    | 0.002 |
|        | CO2      |        |       | 0.858    | 0.526    | 0.002 | 0.763  | 0.001 | 0.001    | 0.007    | 0.000 |
|        | CO2+BGL1 |        |       |          | 0.525    | 0.001 | 0.856  | 0.005 | 0.004    | 0.014    | 0.000 |
|        | CO2+BGL2 |        |       |          |          | 0.002 | 0.241  | 0.002 | 0.014    | 0.006    | 0.000 |
|        | NET      |        |       |          |          |       | 0.002  | 0.489 | 0.000    | 0.222    | 0.000 |
| Ground | BGL      |        |       |          |          |       |        | 0.005 | 0.009    | 0.006    | 0.000 |
|        | CO2      |        |       |          |          |       |        |       | 0.477    | 0.431    | 0.000 |
|        | CO2+BGL1 |        |       |          |          |       |        |       |          | 0.394    | 0.000 |
|        | CO2+BGL2 |        |       |          |          |       |        |       |          |          | 0.000 |
|        | NET      |        |       |          |          |       |        |       |          |          |       |

Techniques/attractants: BGL, CDC with only BG-Lure®; CO2, CDC with only CO2; CO2 + BGL1 or CO2 + BGL2, CDC with CO2 + BG-Lure®; NET, hand-net.

**Table S3.** Descriptive analysis results.

| Strata | Method   | Collection | Minimum | Maximum | Average | Error Average | Error Deviation | Variance |
|--------|----------|------------|---------|---------|---------|---------------|-----------------|----------|
| Canopy | BGL      | 27         | 0       | 1       | 0.04    | 0.037         | 0.192           | 0.037    |
|        | CO2      | 27         | 0       | 29      | 1.37    | 1.076         | 5.589           | 31.242   |
|        | CO2+BGL1 | 27         | 0       | 18      | 1.00    | 0.671         | 3.486           | 12.154   |
|        | CO2+BGL2 | 27         | 0       | 7       | 0.81    | 0.311         | 1.618           | 2.618    |
|        | NET      | 27         | 0       | 28      | 6.67    | 1.639         | 8.517           | 72.538   |
| Ground | BGL      | 27         | 0       | 22      | 1.00    | 0.811         | 4.215           | 17.769   |
|        | CO2      | 27         | 0       | 31      | 6.07    | 1.801         | 9.356           | 87.533   |
|        | CO2+BGL1 | 27         | 0       | 44      | 7.33    | 2.093         | 10.877          | 118.308  |
|        | CO2+BGL2 | 27         | 0       | 23      | 4.48    | 1.377         | 7.154           | 51.182   |
|        | NET      | 27         | 0       | 115     | 35.04   | 6.429         | 33.404          | 1115.806 |

**File S1: Photos of Platforms and CDCs Installed**

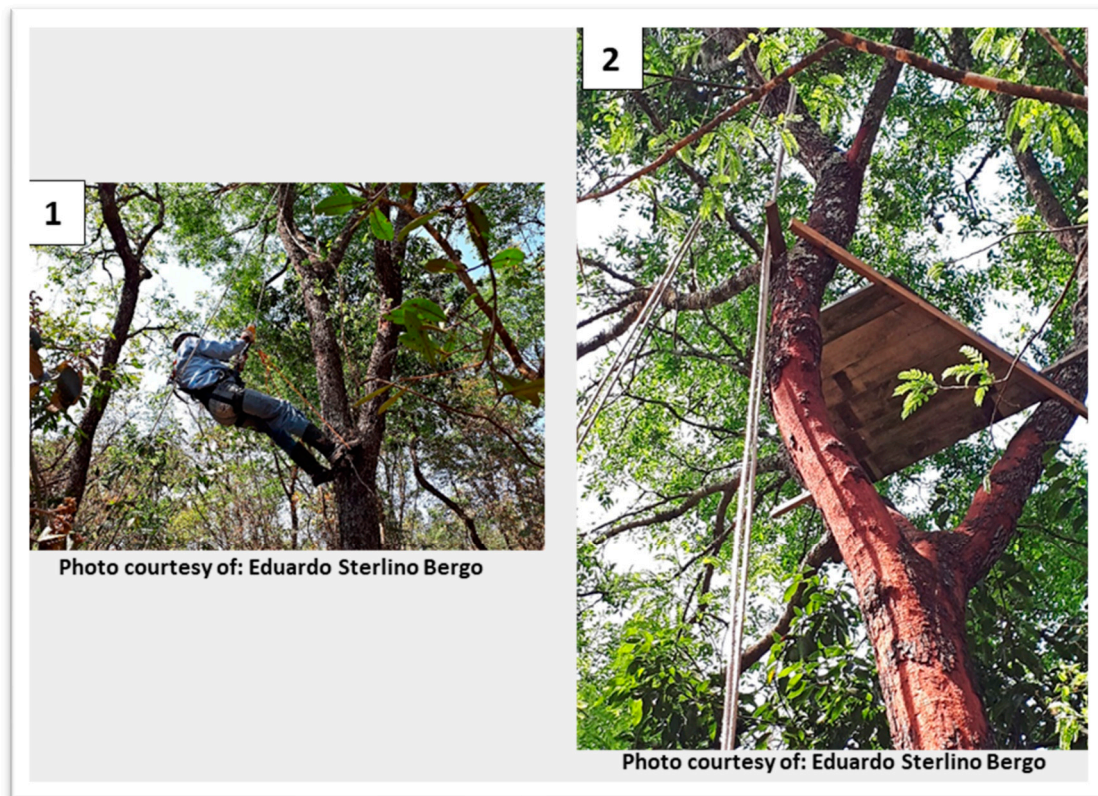

Photos 1 and 2—Preparing and installing the platform.

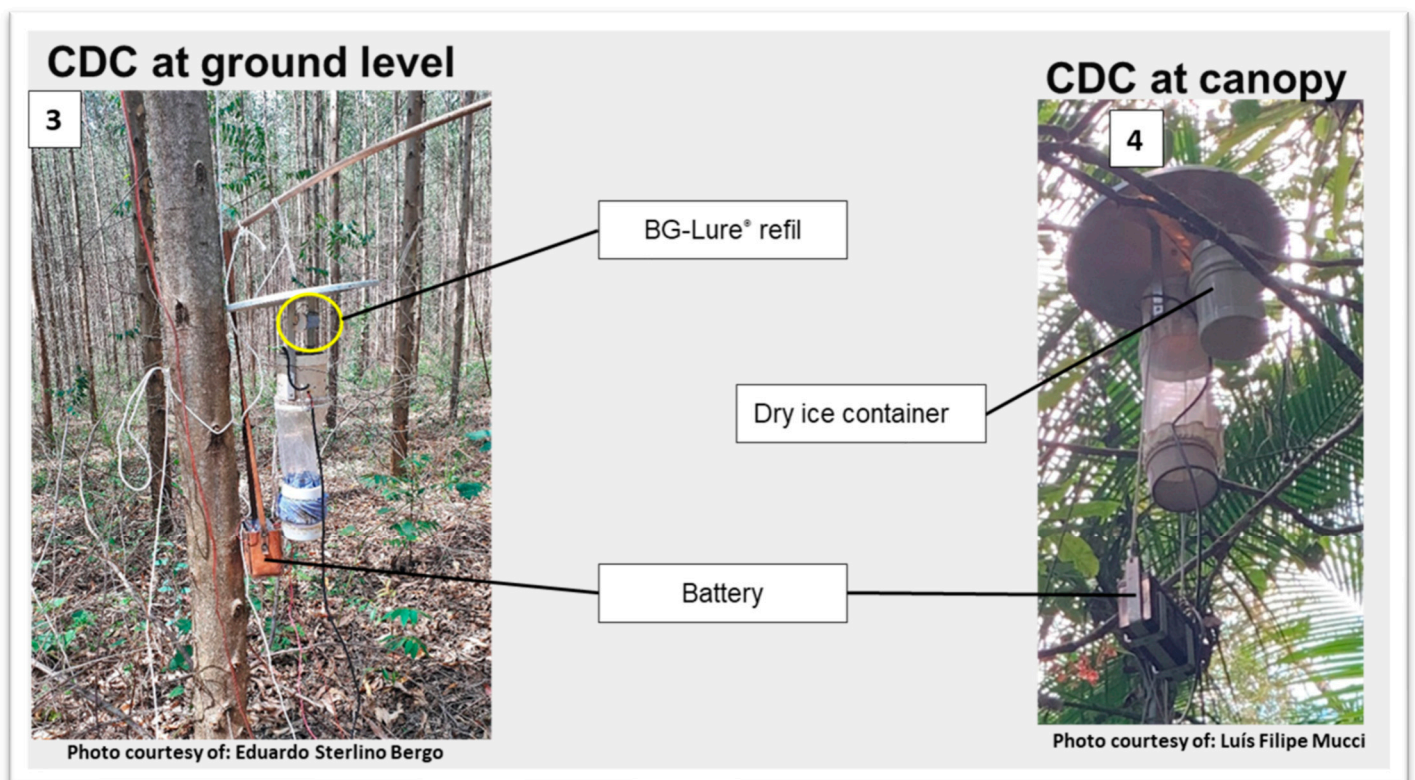

Photos 3 and 4—CDC trap, highlighting the batteries and the attractant.

**File S2.** Description Collection Equipment: Hand-Net and Mouth Aspirator

Adapted from Brasil, M. da S. *Guia de Vigilância de Epizootias Em Primatas Não Humanos e Entomologia Aplicada à Vigilância Da Febre Amarela*; 2nd ed.; Ministério da Saúde, Secretaria de Vigilância em Saúde, Departamento de Vigilância das Doenças Transmissíveis, 2014. ISBN 978-85-334-2102-8. Available in:

[https://bvsmis.saude.gov.br/bvs/publicacoes/guia\\_vigilancia\\_epizootias\\_primatas\\_entomologia.pdf](https://bvsmis.saude.gov.br/bvs/publicacoes/guia_vigilancia_epizootias_primatas_entomologia.pdf).

[Accessed on: July 1st, 2022].

1) Hand-net for mosquitoes capture: fabricated with a rod made of resistant aluminum. It is made of voile (polyester) with a conical shape and tightly closed and resistant weaves, with a seam on the wrong side along the length of the basket and with a very tight seam along the diameter of the rod; the end of the basket is straight and 4cm wide.

Dimensions:

- Cable length of PVC (polyvinyl chloride)-coated cable: 15 cm
- Basket length: 39 cm
- Basket inner diameter: 19 cm

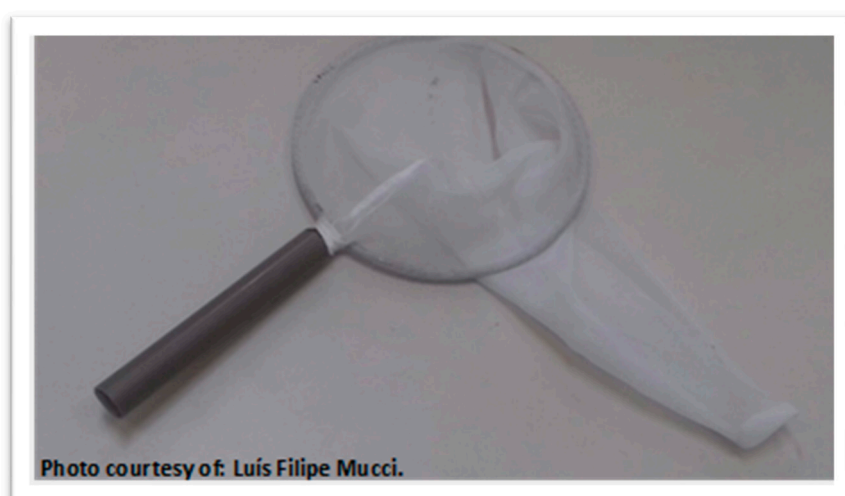

Photo courtesy of: Luís Filipe Mucci.

2. Aspirator for winged mosquitoes with suction base storage, comprising:

- 15 cm test tube (glass or PVC—translucent);
- Attached to the tube is a rubber stopper, approximately 2.6 cm high, 2.4 cm in diameter, and 2 cm in diameter, containing two holes with: a hole to attach a latex tourniquet that is 1 m long with an internal diameter of approximately 5 mm, while the ends of the tourniquet contain one rigid transparent plastic tube of 8 cm for suction; at the other end, which is inside the test tube, there is another rigid plastic with a filter voile on the tip. In the other, there is a hole with a 30 cm rigid-plastic tube whose external end contains a 5x3 cm plastic horn whistle.

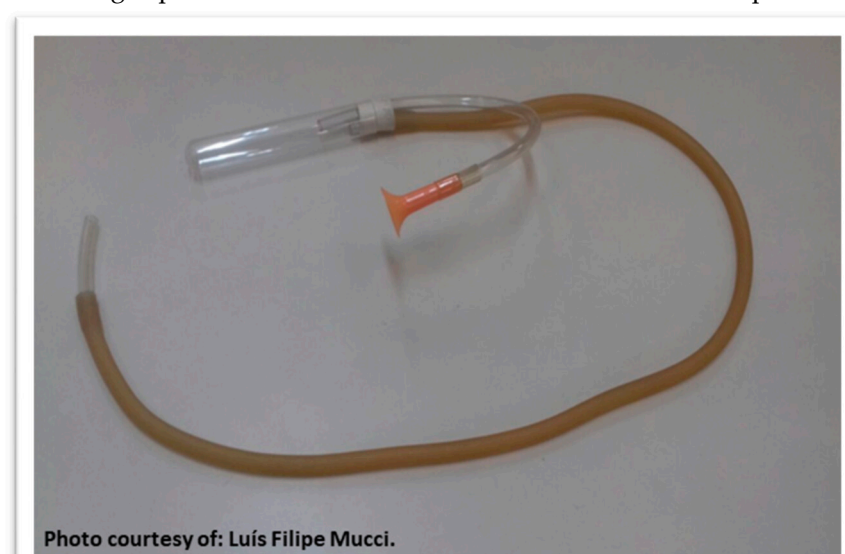

Photo courtesy of: Luís Filipe Mucci.
